# Supplementary material
Source: PubMed Central journal article supplement (PMC9353701)
Supplement: jamaotolaryngolheadnecksurg-e222131-s001.pdf [file jamaotolaryngolheadnecksurg-e222131-s001.pdf]

## Supplementary Online Content

Long SM, Mclean T, Valero Mayor C, et al. Use of intraoperative frozen section to assess final tumor margin status in patients undergoing surgery for oral cavity squamous cell carcinoma. *JAMA Otolaryngol Head Neck Surg*. Published online August 4, 2022. doi:10.1001/jamaoto.2022.2131

**eTable.** Patient, Tumor, and Treatment Characteristics Between Patients With IFSH and Those With No IFSH

This supplementary material has been provided by the authors to give readers additional information about their work.

**eTable.** Patient, Tumor, and Treatment Characteristics Between Patients With IFSH and Those With No IFSH

|                                             | <b>Total<br/>(n=1257)</b> | <b>IFSH<br/>(n=1104)</b> | <b>No IFSH<sup>a</sup><br/>(n=153)</b> | <b>Effect size (95% CI)</b> |
|---------------------------------------------|---------------------------|--------------------------|----------------------------------------|-----------------------------|
| <b>Age, median (IQR), years</b>             | 62 (52-72.5)              | 62 (52-72)               | 64 (54-76)                             | 0.0514 (-0.0039, 0.1064)    |
| <b>Sex</b>                                  |                           |                          |                                        | 0.0211 (-0.0342, 0.0762)    |
| Female                                      | 548 (43.6)                | 477 (43.2)               | 71 (46.4)                              |                             |
| Male                                        | 709 (56.4)                | 627 (56.8)               | 82 (53.6)                              |                             |
| <b>Tobacco, No. (%)</b>                     |                           |                          |                                        | 0.0123 (-0.043, 0.0675)     |
| Never                                       | 481 (38)                  | 420 (38)                 | 61 (40)                                |                             |
| Yes                                         | 776 (62)                  | 684 (62)                 | 92 (60)                                |                             |
| <b>Alcohol, No. (%)</b>                     |                           |                          |                                        | 0.0602 (0.0049, 0.1151)     |
| Never                                       | 383 (30)                  | 325 (29)                 | 58 (38)                                |                             |
| Yes                                         | 874 (70)                  | 779 (71)                 | 95 (62)                                |                             |
| <b>WUHNCI<sup>b</sup></b>                   |                           |                          |                                        | 0.0367 (-0.0186, 0.0918)    |
| 0                                           | 897 (71)                  | 781 (71)                 | 116 (76)                               |                             |
| ≥1                                          | 360 (29)                  | 323 (29)                 | 37 (24)                                |                             |
| <b>Primary site</b>                         |                           |                          |                                        | 0.2235 (0.1694, 0.2762)     |
| Tongue                                      | 680 (54)                  | 639 (57.9)               | 41 (26.8)                              |                             |
| Floor of mouth                              | 144 (11)                  | 123 (11.1)               | 21 (13.7)                              |                             |
| Hard palate                                 | 22 (1.8)                  | 17 (1.5)                 | 5 (3.3)                                |                             |
| Lower or upper gingiva                      | 253 (20.1)                | 192 (17.4)               | 61 (39.9)                              |                             |
| RMT <sup>c</sup> or buccal mucosa           | 158 (12.6)                | 133 (12.1)               | 25 (16.3)                              |                             |
| <b>pT stage (n=1196)</b>                    |                           |                          |                                        | 0.0455 (-0.0112, 0.1019)    |
| T1-T2                                       | 737 (61.6)                | 661 (62.4)               | 76 (55.5)                              |                             |
| T3-T4                                       | 459 (38.4)                | 398 (37.6)               | 61 (44.5)                              |                             |
| <b>pN stage (n=1240)</b>                    |                           |                          |                                        | 0.1748 (0.1198, 0.2288)     |
| Nx                                          | 344 (27.7)                | 270 (24.8)               | 74 (48.4)                              |                             |
| N0                                          | 518 (41.8)                | 472 (43.4)               | 46 (30.1)                              |                             |
| N1                                          | 111 (8.95)                | 104 (9.6)                | 7 (4.6)                                |                             |
| N2                                          | 121 (9.75)                | 109 (10)                 | 12 (7.8)                               |                             |
| N3                                          | 146 (11.8)                | 132 (12.1)               | 14 (9.2)                               |                             |
| <b>Overall stage (n=1193)</b>               |                           |                          |                                        | 0.0084 (-0.0483, 0.0651)    |
| I-II                                        | 606 (50.8)                | 537 (50.9)               | 69 (49.6)                              |                             |
| III-IV                                      | 587 (49.2)                | 517 (49.1)               | 70 (50.4)                              |                             |
| <b>Lymphovascular invasion<br/>(n=1179)</b> |                           |                          |                                        | 0.0098 (-0.0473, 0.0668)    |
| No                                          | 998 (84.6)                | 879 (84.5)               | 119 (85.6)                             |                             |
| Yes                                         | 181 (15.4)                | 161 (15.5)               | 20 (14.4)                              |                             |
| <b>Perineural invasion<br/>(n=1179)</b>     |                           |                          |                                        | 0.0129 (-0.0442, 0.0699)    |
| No                                          | 783 (66.4)                | 693 (66.6)               | 90 (64.7)                              |                             |
| Yes                                         | 396 (33.6)                | 347 (33.3)               | 49 (35.3)                              |                             |
| <b>Adjuvant treatment</b>                   |                           |                          |                                        | 0.0271 (-0.0281, 0.0823)    |
| None                                        | 795 (63.2)                | 693 (62.8)               | 102 (66.7)                             |                             |
| RT                                          | 338 (26.9)                | 300 (27.2)               | 38 (24.8)                              |                             |
| CRT                                         | 124 (9.9)                 | 111 (10.1)               | 13 (8.5)                               |                             |

<sup>a</sup>No IFSH = no intraoperative frozen section of a margin taken for the primary tumor site

<sup>b</sup>Washington University Head and Neck Comorbidity Index

<sup>c</sup>Retromolar trigone
